# Supplementary material for: The Bioaccessibility and Bioavailability of Pentachlorophenol in Five Animal-Derived Foods Measured by Simulated Gastrointestinal Digestion
Source: MDPI journal article supplement (doi:10.3390/foods13081254), 2024-04-19
Supplement: s1 [file s1]

**Supplemental Materials**

**The bioaccessibility and bioavailability of pentachlorophenol in five  
animal-derived foods measured by simulated gastrointestinal digestion**

**Quan Zhou <sup>1</sup>, Hui-Ming Chen <sup>2</sup>, Liang-Liang Li <sup>2</sup>, Yong-Ning Wu <sup>3</sup>, Xing-Fen Yang <sup>2</sup>, Ai-  
Min Jiang <sup>1,\*</sup>, Wei-Liang Wu <sup>2,\*</sup>**

<sup>1</sup> The National Center for Precision Machining and Safety of Livestock and Poultry Products  
Joint Engineering Research Center, College of Food Science, South China Agricultural  
University, Guangzhou 510642, P. R. China

<sup>2</sup> Food Safety and Health Research Center, Guangdong Provincial Key Laboratory of Tropical  
Disease Research, Guangdong-Hongkong-Macao Joint Laboratory for Contaminants Exposure  
and Health, School of Public Health, Southern Medical University, Guangzhou 510515, P. R.  
China

<sup>3</sup> National Center for Food Safety Risk Assessment, Key Laboratory of Food Safety Risk  
Assessment, Ministry of Health, Beijing 100021, P. R. China.

**Correspondence: Wei-Liang Wu: [wu1108@smu.edu.cn](mailto:wu1108@smu.edu.cn); Ai-Min Jiang: [amjiang@sacu.edu.cn](mailto:amjiang@sacu.edu.cn)**

## **Figure Captions**

**Figure S1.** Results of CCK8 assay of five food matrices at 1200 µg/kg ww.

**Figure S2.** Results of validation characteristics for Caco-2 monolayer cell model.

## **Tables**

**Table S1.** Physical-Chemical properties of 8 chlorophenols.

**Table S2.** Gradient elution conditions for liquid chromatography.

**Table S3.** The results of recovery test ( $n = 5$ ) of PCP in five food matrices.

**Table S4.** Average daily intake (g) of five animal-derived foods of different populations.

**Table S5.** Effect of food matrix on bioaccessibility of pentachlorophenol.

**Table S6.** Bioaccessibility and bioavailability were adjusted based on estimates of the daily intake of pentachlorophenol (scenario of medium contamination: 600 µg/kg bw) in terms of the five food groups consumed by the general population, children (age 6–17 years) and adults (age 18–70 years) at average consumption levels.

**Table S7.** Bioaccessibility and bioavailability were adjusted based on estimates of the daily intake of pentachlorophenol (scenario of high contamination: 1200 µg/kg bw) in terms of the five food groups consumed by the general population, children (age 6–17 years) and adults (age 18–70 years) at average consumption levels.

## **Consumption and body weight data [1]**

The data of daily consumption of animal-derived foods and body weight of local residents were obtained from the National Nutrition and Health Survey (NAHS) conducted by the

57 Guangdong Provincial Center for Disease Control and Prevention in 2012. A total of 3780  
58 households were selected from 9 counties/districts in Guangdong Province, out of which 2112  
59 households were surveyed, including 1297 urban households and 815 rural households. A  
60 comprehensive survey was conducted on a total of 5,179 residents aged between 6 to 70 years  
61 over a period of three consecutive days, capturing their food and nutrient intake patterns,  
62 encompassing average consumption levels of five animal-derived foods.

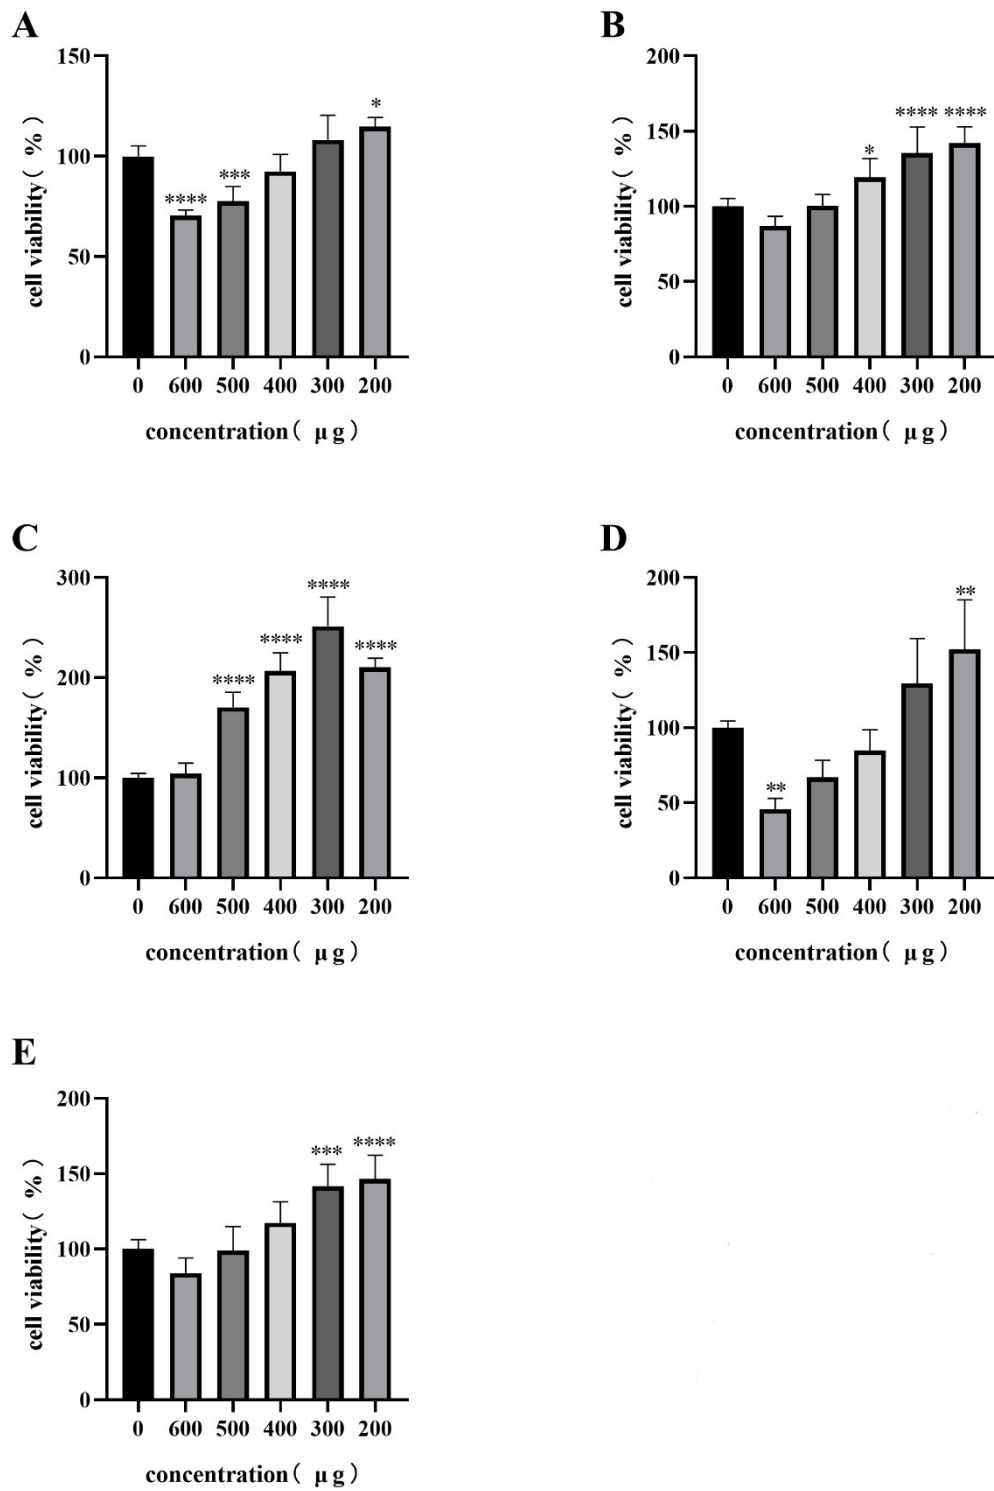

**Figure S1.** Results of CCK8 assay of five food matrices at 1200 µg/kg ww: (a) pork; (b) beef; (c) pork liver; (d) chicken; (e) freshwater fish. \*  $p < 0.05$  vs control group; \*\*  $p < 0.01$  vs control group; \*\*\*  $p < 0.001$  vs control group; \*\*\*\*  $p < 0.0001$  vs control group;

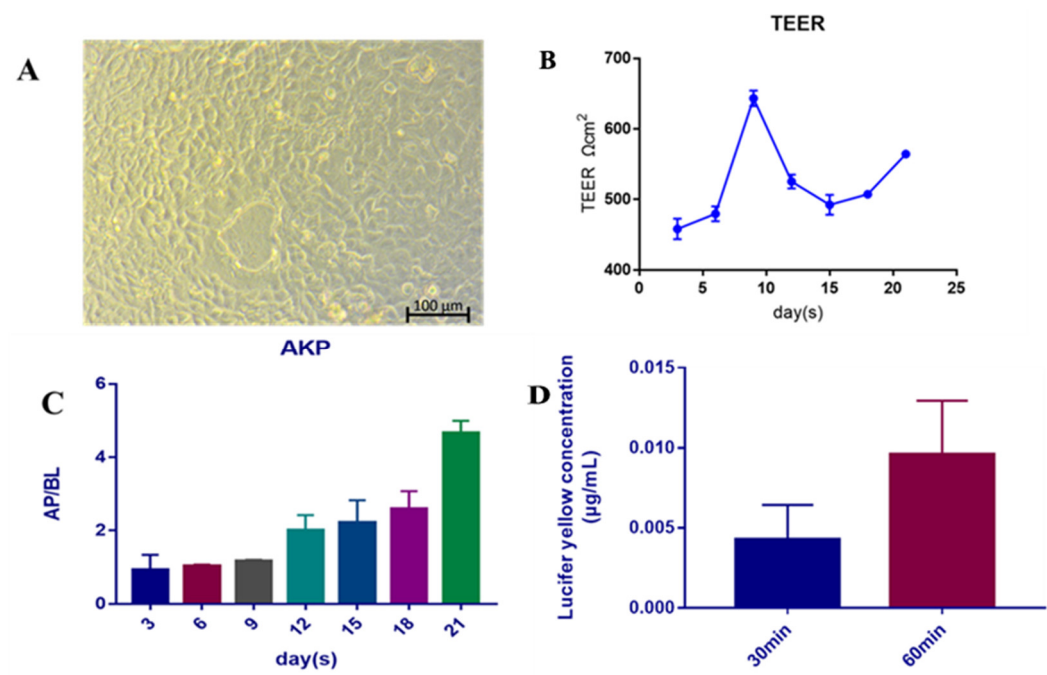

68

69 **Figure S2.** Results of validation characteristics for Caco-2 monolayer cell model: (a) image of  
70 Caco-2 cell model; (b) transmembrane resistance value of the Caco-2 cell model; (c) AKP activity  
71 of Caco-2 cell model; (d) Lucifer yellow permeability coefficient.

72

73

74

75

76

77

78

79

80

81

82

83

84

85

86

87

88

89 **Table S1.** Chemical composition of digestive juice (per liter)

| Oral phase                             | Gastric juice                              | Duodenal juice                             | Bile juice                                  |
|----------------------------------------|--------------------------------------------|--------------------------------------------|---------------------------------------------|
| 0.9 g KCl                              | 2.75 g NaCl                                | 7.01 g NaCl                                | 5.26 g NaCl                                 |
| 0.2 g KSCN                             | 0.27 g NaH <sub>2</sub> PO <sub>4</sub>    | 3.39 g NaHCO <sub>3</sub>                  | 5.79 g NaHCO <sub>3</sub>                   |
| 0.9 g NaH <sub>2</sub> PO <sub>4</sub> | 0.82 g KCl                                 | 0.08 g KH <sub>2</sub> PO <sub>4</sub>     | 0.38 g KCl                                  |
| 0.57 g Na <sub>2</sub> SO <sub>4</sub> | 0.4 g CaCl <sub>2</sub> ·2H <sub>2</sub> O | 0.56 g KCl                                 | 0.25 g urea                                 |
| 0.3 g NaCl                             | 0.31 g NH <sub>4</sub> Cl                  | 0.05 g MgCl <sub>2</sub>                   | 0.22 g CaCl <sub>2</sub> ·2H <sub>2</sub> O |
| 1.7 g NaHCO <sub>3</sub>               | 0.65 g glucose                             | 0.1 g urea                                 | 1.8 g BSA                                   |
| 0.2 g urea                             | 0.02 g glucuronic acid                     | 0.2 g CaCl <sub>2</sub> ·2H <sub>2</sub> O | 30 g bile                                   |
| 290 mg α-amylase                       | 0.085 g urea                               | 1 g BSA                                    | pH 6.5                                      |
| 15 mg uric acid                        | 0.33 g glucosamine hydrochloride           | 9 g pancreatin                             |                                             |
| 25 mg mucin                            | 1 g BSA                                    | 1.5 g lipase                               |                                             |
| pH 6.5                                 | 2.5 g pepsin                               | pH 7.5                                     |                                             |
|                                        | 3 g mucin                                  |                                            |                                             |
|                                        | pH 2.0                                     |                                            |                                             |

90  
91  
92  
93  
94  
95  
96  
97  
98  
99  
100  
101  
102  
103  
104  
105  
106  
107  
108  
109  
110  
111  
112  
113  
114

**Table S2.** Gradient elution conditions for liquid chromatography.

| <b>Time (min)</b> | <b>Elution A (%)</b> | <b>Elution B (%)</b> |
|-------------------|----------------------|----------------------|
| 0.00              | 40                   | 60                   |
| 1.00              | 100                  | 0                    |
| 7.00              | 100                  | 0                    |
| 7.50              | 40                   | 60                   |
| 12.00             | 40                   | 60                   |

146 **Table S3.** The results of recovery test ( $n = 5$ ) of PCP in five food matrices.

| Group           | Recoveries (%) |              |              |
|-----------------|----------------|--------------|--------------|
|                 | 100 µg/kg      | 600 µg/kg    | 1200 µg/kg   |
| Pork            | 98.6 ± 3.38    | 102.6 ± 3.63 | 103.3 ± 4.26 |
| Beef            | 96.9 ± 2.96    | 100.7 ± 2.84 | 106.8 ± 3.71 |
| Pork liver      | 96.5 ± 3.54    | 98.2 ± 3.82  | 100.6 ± 3.22 |
| Chicken         | 97.1 ± 2.89    | 97.1 ± 4.11  | 99.2 ± 4.05  |
| Freshwater fish | 97.8 ± 3.72    | 99.5 ± 3.69  | 100.8 ± 2.75 |

147

148

149

150

151

152

153

154

155

156

157

158

159

160

161

162

163

164

165

166

167

168

169

170

171

172

173

174

175

176



177 **Table S4.** Average daily intake (g) of five animal-derived foods of different populations.

| <b>Food groups</b> | <b>General population</b> | <b>Boys</b> | <b>Girls</b> | <b>Male adults</b> | <b>Female adults</b> |
|--------------------|---------------------------|-------------|--------------|--------------------|----------------------|
| Pork               | 104.2                     | 99.7        | 88.5         | 106.0              | 70.4                 |
| Beef               | 10.3                      | 7.4         | 5.1          | 8.6                | 6.7                  |
| Pork liver         | 7.3                       | 4.5         | 4.4          | 8.0                | 5.9                  |
| Chicken            | 39.3                      | 34.7        | 26.9         | 40.1               | 36.8                 |
| Freshwater fish    | 56.2                      | 35.2        | 43.0         | 63.0               | 54.1                 |

178  
179  
180  
181  
182  
183  
184  
185  
186  
187  
188  
189  
190  
191  
192  
193  
194  
195  
196  
197  
198  
199  
200  
201

202 **Table S5.** Effect of food matrix on bioaccessibility of pentachlorophenol.

| Concentration<br>( $\mu\text{g/kg ww}$ ) | Culinary<br>treatment | Group           | Bioaccessibility (%)  |                       |                       |
|------------------------------------------|-----------------------|-----------------|-----------------------|-----------------------|-----------------------|
|                                          |                       |                 | Oral cavity           | Stomach               | Small intestine       |
| 100                                      | Steaming              | Pork            | $12.51 \pm 1.56^a$    | $51.05 \pm 2.88^a$    | $58.86 \pm 2.43^a$    |
|                                          |                       | Beef            | $10.35 \pm 1.77^{ab}$ | $42.51 \pm 2.29^b$    | $50.39 \pm 2.08^b$    |
|                                          |                       | Pork liver      | $8.52 \pm 2.01^b$     | $37.89 \pm 3.02^c$    | $48.76 \pm 2.49^b$    |
|                                          |                       | Chicken         | $7.09 \pm 2.18^b$     | $30.48 \pm 1.96^d$    | $40.71 \pm 3.92^c$    |
|                                          |                       | Freshwater fish | $7.72 \pm 1.46^b$     | $18.02 \pm 2.51^e$    | $27.31 \pm 3.62^d$    |
|                                          | Boiling               | Pork            | $11.63 \pm 2.08^a$    | $46.39 \pm 2.24^a$    | $50.61 \pm 2.17^a$    |
|                                          |                       | Beef            | $8.90 \pm 2.06^b$     | $38.74 \pm 3.06^b$    | $47.92 \pm 1.46^a$    |
|                                          |                       | Pork liver      | $6.41 \pm 1.74^{bc}$  | $33.54 \pm 2.62^c$    | $41.54 \pm 2.18^b$    |
|                                          |                       | Chicken         | $6.73 \pm 1.50^{bc}$  | $24.53 \pm 2.27^d$    | $31.32 \pm 2.48^c$    |
|                                          |                       | Freshwater fish | $5.62 \pm 1.84^c$     | $14.14 \pm 2.46^e$    | $21.82 \pm 2.62^d$    |
|                                          | Pan-frying            | Pork            | $16.80 \pm 1.17^a$    | $70.64 \pm 3.59^a$    | $81.37 \pm 2.16^a$    |
|                                          |                       | Beef            | $13.83 \pm 1.44^b$    | $64.50 \pm 2.31^b$    | $72.09 \pm 3.54^b$    |
|                                          |                       | Pork liver      | $10.08 \pm 2.52^c$    | $56.43 \pm 3.08^c$    | $69.11 \pm 3.02^c$    |
|                                          |                       | Chicken         | $9.89 \pm 1.63^c$     | $51.08 \pm 1.62^d$    | $63.43 \pm 3.27^d$    |
|                                          |                       | Freshwater fish | $8.86 \pm 2.04^c$     | $45.72 \pm 3.14^e$    | $60.27 \pm 2.25^d$    |
| 600                                      | Steaming              | Pork            | $20.32 \pm 1.83^a$    | $53.92 \pm 1.96^a$    | $62.83 \pm 3.52^a$    |
|                                          |                       | Beef            | $14.34 \pm 2.51^b$    | $50.84 \pm 2.09^a$    | $58.33 \pm 2.48^b$    |
|                                          |                       | Pork liver      | $11.63 \pm 1.64^c$    | $44.83 \pm 3.14^b$    | $54.41 \pm 2.66^c$    |
|                                          |                       | Chicken         | $8.23 \pm 0.96^d$     | $36.56 \pm 2.09^c$    | $48.02 \pm 2.33^d$    |
|                                          |                       | Freshwater fish | $7.03 \pm 1.50^d$     | $22.61 \pm 3.46^d$    | $30.45 \pm 1.86^e$    |
|                                          | Boiling               | Pork            | $13.83 \pm 1.27^a$    | $46.49 \pm 1.53^a$    | $52.91 \pm 3.19^a$    |
|                                          |                       | Beef            | $10.42 \pm 2.16^b$    | $46.35 \pm 1.55^a$    | $53.73 \pm 2.16^a$    |
|                                          |                       | Pork liver      | $10.11 \pm 1.47^b$    | $47.41 \pm 2.61^a$    | $52.18 \pm 2.07^a$    |
|                                          |                       | Chicken         | $8.05 \pm 1.23^b$     | $30.74 \pm 2.08^b$    | $40.09 \pm 2.62^b$    |
|                                          |                       | Freshwater fish | $4.93 \pm 0.86^c$     | $19.05 \pm 2.78^c$    | $23.19 \pm 2.54^c$    |
|                                          | Pan-frying            | Pork            | $27.16 \pm 3.19^a$    | $78.17 \pm 3.12^a$    | $84.27 \pm 4.14^a$    |
|                                          |                       | Beef            | $23.61 \pm 3.52^b$    | $68.03 \pm 2.41^b$    | $79.62 \pm 1.74^b$    |
|                                          |                       | Pork liver      | $18.19 \pm 2.67^c$    | $61.53 \pm 1.74^c$    | $71.25 \pm 3.12^c$    |
|                                          |                       | Chicken         | $14.63 \pm 2.83^d$    | $63.58 \pm 2.14^c$    | $71.73 \pm 2.76^c$    |
|                                          |                       | Freshwater fish | $9.19 \pm 1.26^e$     | $53.46 \pm 2.13^d$    | $69.13 \pm 2.47^c$    |
| 1200                                     | Steaming              | Pork            | $23.41 \pm 1.86^a$    | $61.95 \pm 3.48^a$    | $70.53 \pm 4.34^a$    |
|                                          |                       | Beef            | $19.39 \pm 2.21^b$    | $58.91 \pm 4.11^a$    | $66.41 \pm 2.34^b$    |
|                                          |                       | Pork liver      | $15.71 \pm 2.63^c$    | $48.32 \pm 2.54^b$    | $60.53 \pm 4.62^c$    |
|                                          |                       | Chicken         | $11.80 \pm 2.76^d$    | $44.56 \pm 3.36^b$    | $57.06 \pm 3.14^c$    |
|                                          |                       | Freshwater fish | $9.26 \pm 1.86^d$     | $29.84 \pm 2.65^d$    | $36.24 \pm 2.05^d$    |
|                                          | Boiling               | Pork            | $17.05 \pm 0.96^a$    | $53.46 \pm 2.47^a$    | $62.39 \pm 4.62^a$    |
|                                          |                       | Beef            | $15.18 \pm 1.53^a$    | $50.63 \pm 3.18^a$    | $60.16 \pm 2.21^a$    |
|                                          |                       | Pork liver      | $12.08 \pm 1.74^b$    | $44.69 \pm 1.86^b$    | $56.32 \pm 1.35^b$    |
|                                          |                       | Chicken         | $10.03 \pm 1.76^{bc}$ | $35.09 \pm 4.02^c$    | $49.24 \pm 3.39^c$    |
|                                          |                       | Freshwater fish | $8.52 \pm 0.69^c$     | $24.26 \pm 2.78^d$    | $30.36 \pm 3.47^d$    |
|                                          | Pan-frying            | Pork            | $35.03 \pm 1.85^a$    | $81.57 \pm 1.62^a$    | $90.36 \pm 3.38^a$    |
|                                          |                       | Beef            | $28.86 \pm 3.16^b$    | $73.89 \pm 3.24^b$    | $83.63 \pm 4.01^b$    |
|                                          |                       | Pork liver      | $22.12 \pm 3.18^c$    | $70.46 \pm 2.06^{bc}$ | $78.07 \pm 2.37^c$    |
|                                          |                       | Chicken         | $18.09 \pm 1.54^d$    | $68.42 \pm 3.83^c$    | $75.52 \pm 1.74^{cd}$ |
|                                          |                       | Freshwater fish | $12.26 \pm 1.41^e$    | $62.48 \pm 1.71^d$    | $72.14 \pm 2.73^d$    |

203 In the same column of each cooking method, the average values of food matrices with different  
 204 lowercase letters have statistically significant differences ( $p < 0.05$ ).

205

206

207

208 **Table S6.** Bioaccessibility and bioavailability were adjusted based on estimates of the daily intake of pentachlorophenol (scenario of medium contamination:  
 209 600 µg/kg bw) in terms of the five food groups consumed by the general population, children (age 6–17 years) and adults (age 18–70 years) at average  
 210 consumption levels.

| Group           | Culinary treatments     | Bioaccessibility<br>(%) | Bioavailability<br>(%) | Estimated daily intakes (µg/kg bw) |       |       |             |               |
|-----------------|-------------------------|-------------------------|------------------------|------------------------------------|-------|-------|-------------|---------------|
|                 |                         |                         |                        | General population                 | Boys  | Girls | Male adults | Female adults |
| Pork            | Conventional assumption | 100                     | 100                    | 1.028                              | 1.286 | 1.292 | 0.986       | 0.774         |
|                 | Steaming                | 62.83                   | 37.84                  | 0.244                              | 0.306 | 0.307 | 0.234       | 0.184         |
|                 | Boiling                 | 52.91                   | 33.92                  | 0.184                              | 0.231 | 0.232 | 0.177       | 0.139         |
|                 | Pan-frying              | 84.27                   | 59.86                  | 0.519                              | 0.649 | 0.652 | 0.497       | 0.390         |
| Beef            | Conventional assumption | 100                     | 100                    | 0.102                              | 0.096 | 0.075 | 0.080       | 0.074         |
|                 | Steaming                | 58.33                   | 33.64                  | 0.020                              | 0.019 | 0.015 | 0.016       | 0.014         |
|                 | Boiling                 | 53.73                   | 26.42                  | 0.014                              | 0.014 | 0.011 | 0.011       | 0.010         |
|                 | Pan-frying              | 79.62                   | 50.1                   | 0.041                              | 0.038 | 0.030 | 0.032       | 0.029         |
| Pork liver      | Conventional assumption | 100                     | 100                    | 0.072                              | 0.058 | 0.066 | 0.074       | 0.065         |
|                 | Steaming                | 54.41                   | 31.92                  | 0.013                              | 0.010 | 0.011 | 0.013       | 0.011         |
|                 | Boiling                 | 52.18                   | 28.36                  | 0.011                              | 0.009 | 0.010 | 0.011       | 0.010         |
|                 | Pan-frying              | 71.25                   | 43.29                  | 0.022                              | 0.018 | 0.020 | 0.023       | 0.020         |
| Chicken         | Conventional assumption | 100                     | 100                    | 0.388                              | 0.448 | 0.393 | 0.373       | 0.404         |
|                 | Steaming                | 48.02                   | 26.47                  | 0.049                              | 0.057 | 0.050 | 0.047       | 0.051         |
|                 | Boiling                 | 40.09                   | 19.05                  | 0.030                              | 0.034 | 0.030 | 0.028       | 0.031         |
|                 | Pan-frying              | 71.73                   | 39.51                  | 0.110                              | 0.127 | 0.111 | 0.106       | 0.114         |
| Freshwater fish | Conventional assumption | 100                     | 100                    | 0.555                              | 0.454 | 0.628 | 0.586       | 0.595         |
|                 | Steaming                | 30.45                   | 17.84                  | 0.030                              | 0.025 | 0.034 | 0.032       | 0.032         |
|                 | Boiling                 | 23.19                   | 12.08                  | 0.016                              | 0.013 | 0.018 | 0.016       | 0.017         |
|                 | Pan-frying              | 69.13                   | 22.11                  | 0.085                              | 0.069 | 0.096 | 0.090       | 0.091         |

211  
 212  
 213  
 214  
 215

**Table S7.** Bioaccessibility and bioavailability were adjusted based on estimates of the daily intake of pentachlorophenol (scenario of high contamination: 1200 µg/kg bw) in terms of the five food groups consumed by the general population, children (age 6–17 years) and adults (age 18–70 years) at average consumption levels.

| Group           | Culinary treatments     | Bioaccessibility<br>(%) | Bioavailability<br>(%) | Estimated daily intakes (µg/kg bw) |       |       |             |               |
|-----------------|-------------------------|-------------------------|------------------------|------------------------------------|-------|-------|-------------|---------------|
|                 |                         |                         |                        | General population                 | Boys  | Girls | Male adults | Female adults |
| Pork            | Conventional assumption | 100                     | 100                    | 2.057                              | 2.573 | 2.584 | 1.972       | 1.547         |
|                 | Steaming                | 70.53                   | 41.53                  | 0.603                              | 0.754 | 0.757 | 0.578       | 0.453         |
|                 | Boiling                 | 62.39                   | 36.72                  | 0.471                              | 0.589 | 0.592 | 0.452       | 0.354         |
|                 | Pan-frying              | 90.36                   | 63.41                  | 1.179                              | 0.432 | 0.434 | 1.130       | 0.886         |
| Beef            | Conventional assumption | 100                     | 100                    | 0.203                              | 0.191 | 0.149 | 0.160       | 0.147         |
|                 | Steaming                | 66.41                   | 39.53                  | 0.053                              | 0.050 | 0.039 | 0.042       | 0.039         |
|                 | Boiling                 | 60.16                   | 33.54                  | 0.041                              | 0.039 | 0.030 | 0.032       | 0.030         |
|                 | Pan-frying              | 83.63                   | 53.43                  | 0.091                              | 0.022 | 0.017 | 0.071       | 0.066         |
| Pork liver      | Conventional assumption | 100                     | 100                    | 0.144                              | 0.116 | 0.128 | 0.149       | 0.130         |
|                 | Steaming                | 60.53                   | 34.43                  | 0.030                              | 0.024 | 0.027 | 0.031       | 0.027         |
|                 | Boiling                 | 56.32                   | 30.01                  | 0.024                              | 0.020 | 0.022 | 0.025       | 0.022         |
|                 | Pan-frying              | 78.07                   | 47.11                  | 0.053                              | 0.009 | 0.010 | 0.055       | 0.048         |
| Chicken         | Conventional assumption | 100                     | 100                    | 0.776                              | 0.895 | 0.785 | 0.746       | 0.809         |
|                 | Steaming                | 57.06                   | 30.48                  | 0.135                              | 0.156 | 0.137 | 0.130       | 0.141         |
|                 | Boiling                 | 49.24                   | 25.31                  | 0.097                              | 0.112 | 0.098 | 0.093       | 0.101         |
|                 | Pan-frying              | 75.52                   | 40.83                  | 0.239                              | 0.048 | 0.042 | 0.230       | 0.249         |
| Freshwater fish | Conventional assumption | 100                     | 100                    | 1.109                              | 0.908 | 1.255 | 1.172       | 1.189         |
|                 | Steaming                | 36.24                   | 20.64                  | 0.083                              | 0.068 | 0.094 | 0.088       | 0.089         |
|                 | Boiling                 | 30.36                   | 12.86                  | 0.043                              | 0.035 | 0.049 | 0.046       | 0.046         |
|                 | Pan-frying              | 72.14                   | 27.09                  | 0.217                              | 0.013 | 0.018 | 0.229       | 0.232         |

219  
220  
221  
222  
223

224    **Reference:**

- 225    1.    Zhang, Y.H.; Ma, W.J. Analysis for ten-years changes of dietary nutrition and health status of Guangdong residents, 1st ed.; Zhijian Publishing House:  
226    Beijing, China, 2016; pp. 102–115. (in Chinese)
